# Supplementary material for: The ex vivo human translaminar autonomous system to study spaceflight associated neuro-ocular syndrome pathogenesis
Source: Springer Nature journal article supplement (doi:10.1038/s41526-022-00232-5), 2022-10-28
Supplement: 41526_2022_232_MOESM1_ESM.pdf [file 41526_2022_232_MOESM1_ESM.pdf]

**a** Solid 3D printed view

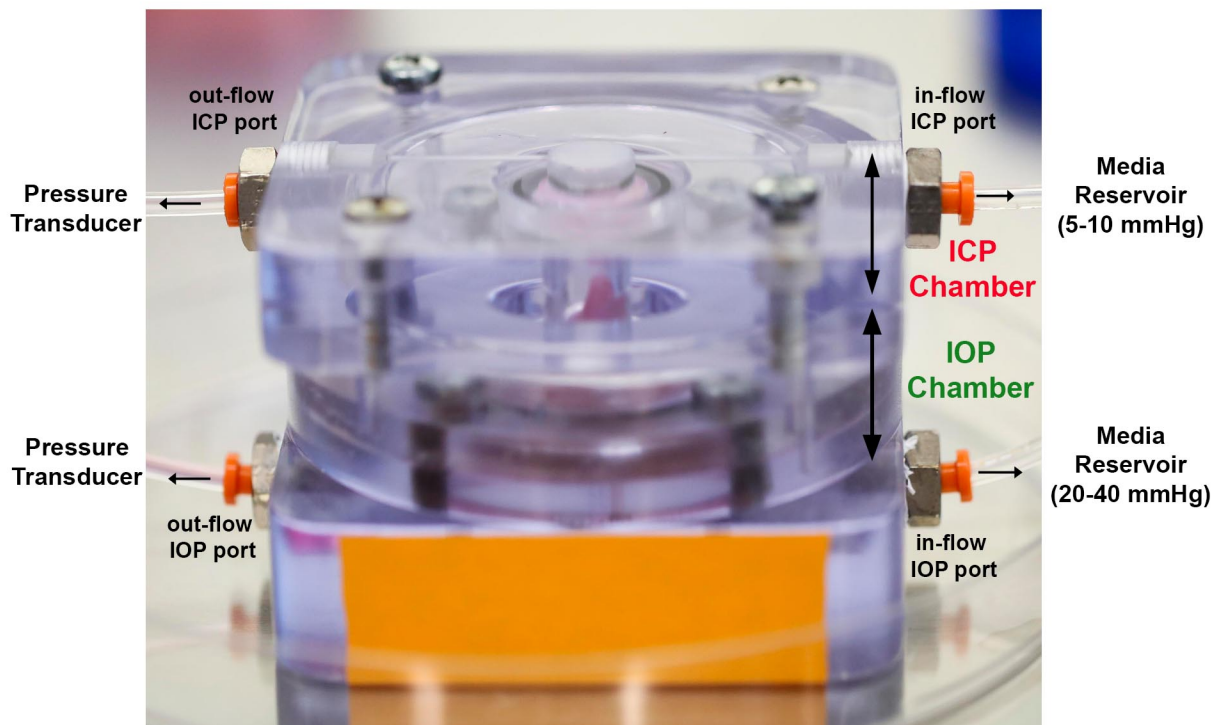

**b** 6 degree tilt insert

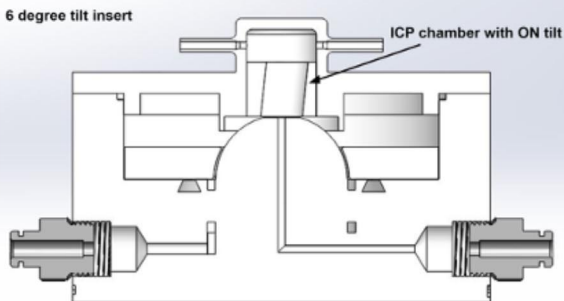

10 degree tilt insert

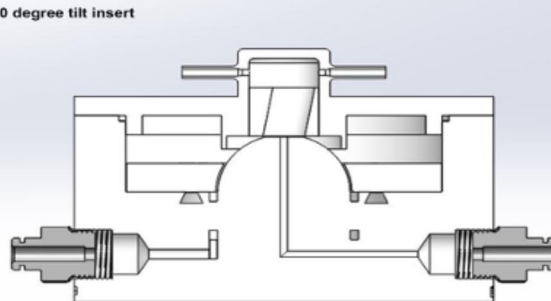

**c**

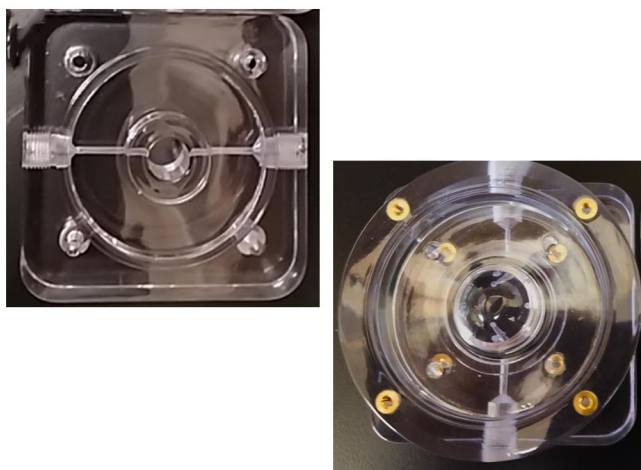

**d**

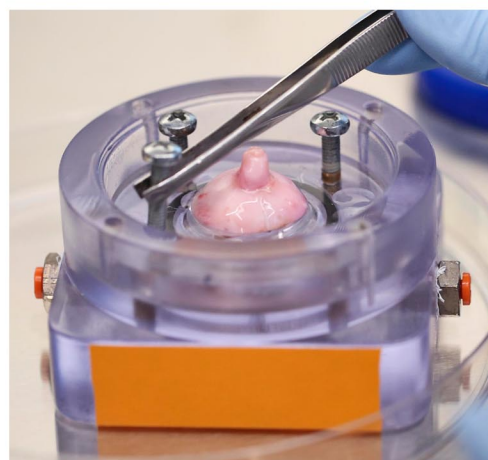

**Supplemental Figure 1: Translaminal autonomous system Model depiction.** (a) Solid 3D printed view. with chambers depicted (b) Diagrammatic view of 6° tilt and 10° tilt. Actual 3D printed stereolithography (Clearvue Polished) model (c) top chamber lid and bottom chamber with (d) a human posterior segment depicted in the model. All images are copyright of Tasneem Sharma, 2022. All rights reserved

**a. Fibronectin**

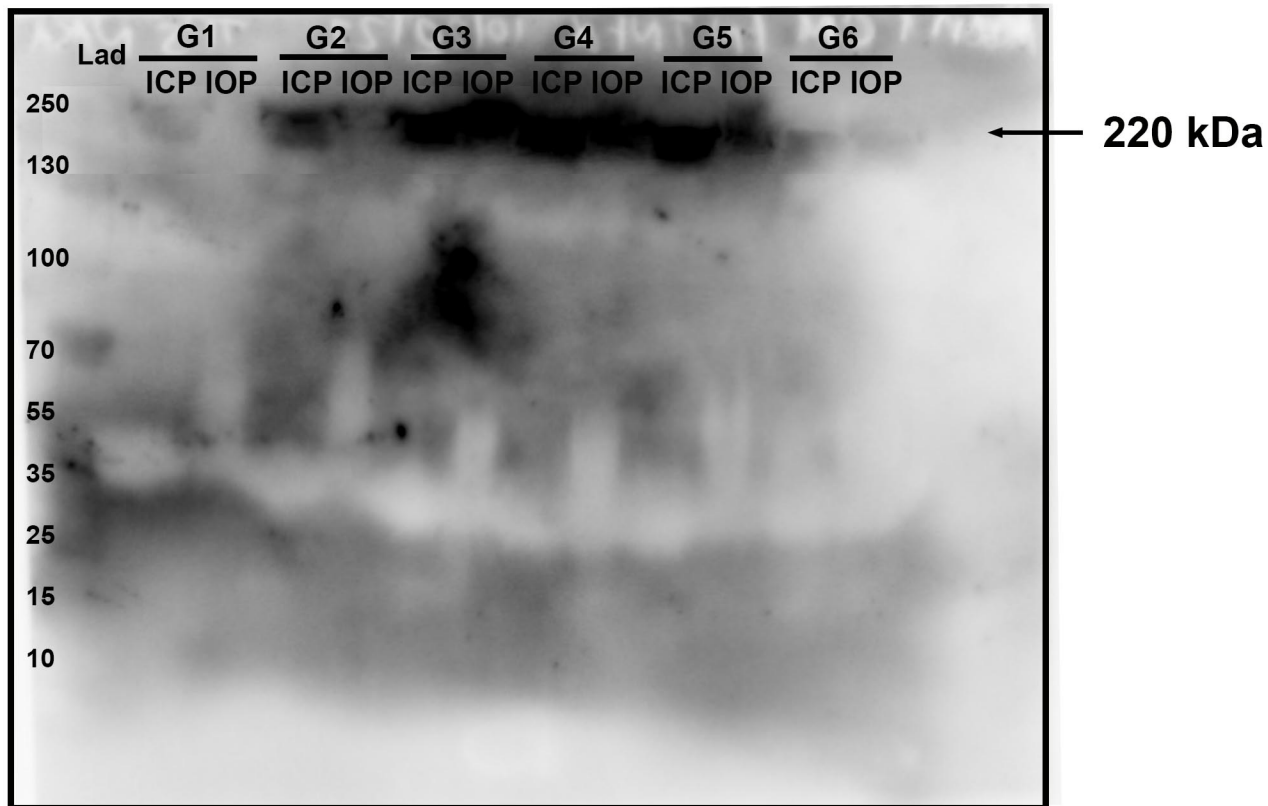

**b. Collagen IV**

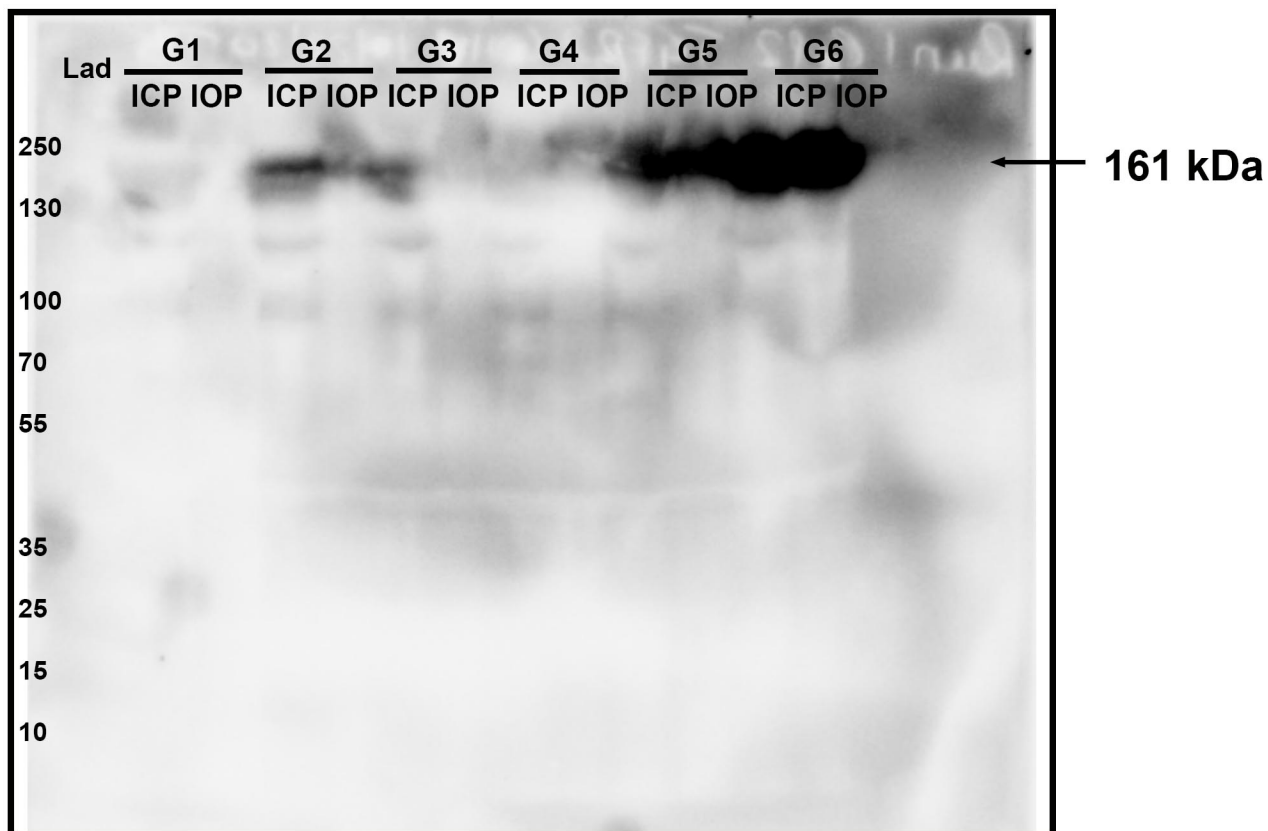

**Supplemental Fig. 2: Western blots of conditioned medium collected from the IOP and ICP chambers of every group throughout 14-day perfusion culture** Densitometric values of (a) FN and (b) COLIV. ICP=intracranial pressure; IOP=intraocular pressure; G1 = group 1; G2 = group 2; G3 = group 3; G4 = group 4; G5 = group 5; G6 = group 6; N=3. All images are copyright of Tasneem Sharma, 2022. All rights reserved

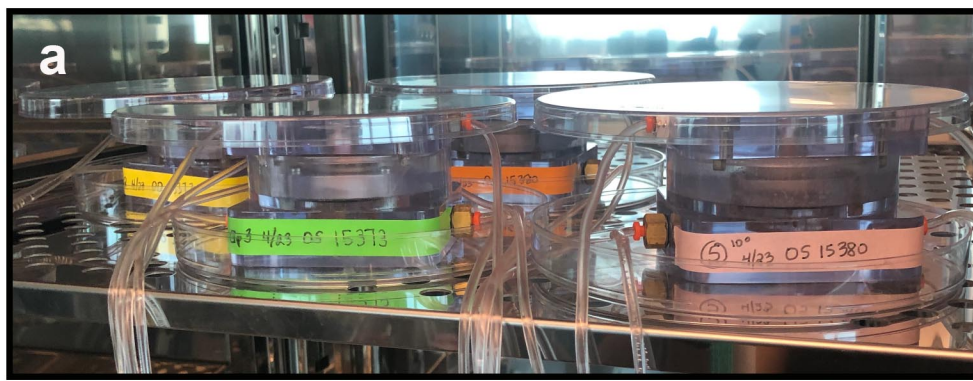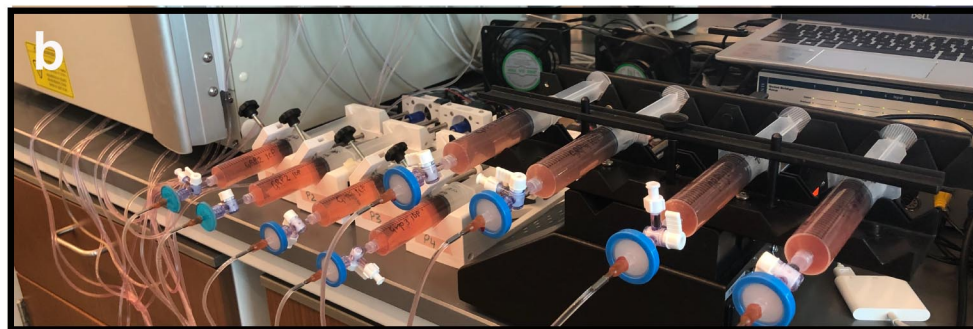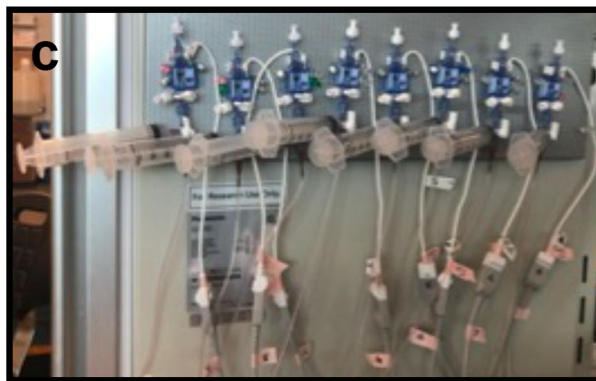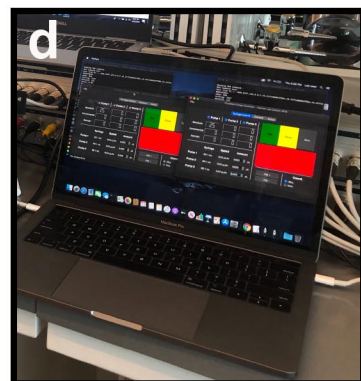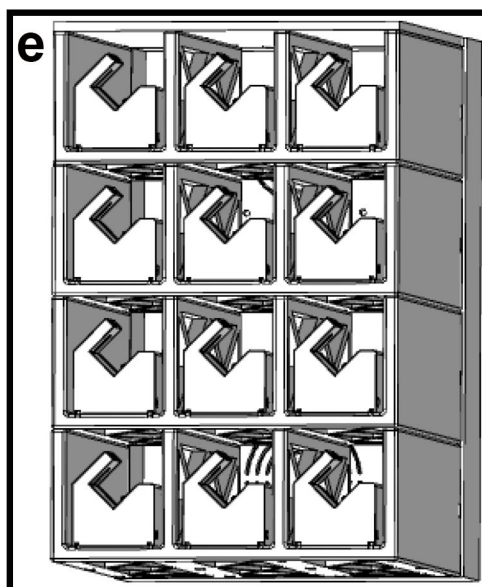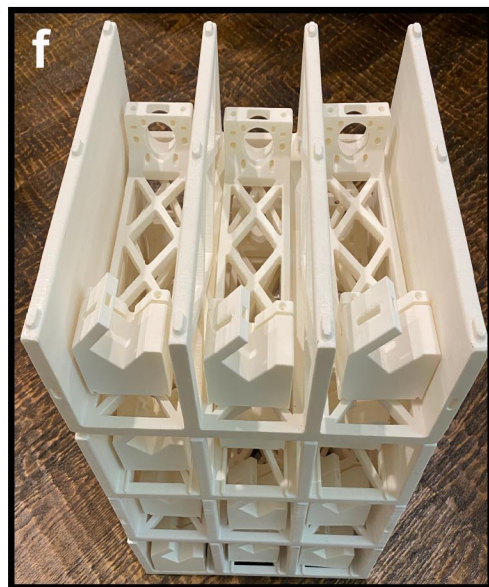

**Supplemental Fig. 3: Mechanics of the translaminar autonomous system and newly modeled 16 chamber system.** Experimental setup for the TAS model. (a) Image of the TAS model with all the fittings in place and (b) representation of inflow and outflow reservoir syringes on individualized pumps. (c) Perfusion of medium through an infusion pump with an exit empty syringe on the transducer end to collect conditioned medium in (d) an automated fashion through computational modeling. Depiction of the newly designed 16-chamber perfusion system with (e) solid front view and (f) actual 3D printed stereolithography (Clearvue Polished) model. All images are copyright of Tasneem Sharma, 2022. All rights reserved

Supplemental Table 1: Tabulation of donor information. Tabular information of human donors utilized within the study with identification of gender, age, race, and diagnosis

| Subject# | Eye | Gender | Age | Race      | Group | Days on System | Diagnosis                                                                                    |
|----------|-----|--------|-----|-----------|-------|----------------|----------------------------------------------------------------------------------------------|
| 7346     | OD  | Female | 64  | Caucasian | 1     | 14             | Myocardial infarction, Lung cancer (dx 2019, active), Mets to liver (active), Thyroid cancer |
| 7346     | OS  | Female | 64  | Caucasian | 2     | 14             |                                                                                              |
| 15373    | OD  | Female | 86  | Caucasian | 3     | 14             | Pancreatic cancer with mets to kidneys. HTN, Hyperthyroidism, Shingles, Gout, Recurrent      |
| 15373    | OS  | Female | 86  | Caucasian | 4     | 14             |                                                                                              |
| 15380    | OD  | Female | 89  | Caucasian | 5     | 14             | Bowel obstruction. Interstitial lung disease, HTN, GERD, PVD, Hypothyroidism, Ulcerative     |
| 15380    | OS  | Female | 89  | Caucasian | 6     | 14             |                                                                                              |
| 18004    | OD  | Male   | 82  | Caucasian | 1     | 13             | Hip Fracture, Stroke, AFib, COPD, HTN, Kidney disease, Stroke, COVID test negative           |
| 18004    | OS  | Male   | 82  | Caucasian | 2     | 13             |                                                                                              |
| 20779    | OD  | Male   | 78  | Caucasian | 3     | 12             | Pancreatic cancer, Weakness, Hypokalemia                                                     |
| 20779    | OS  | Male   | 78  | Caucasian | 4     | 12             |                                                                                              |
| 22196    | OD  | Female | 55  | Caucasian | 5     | 12             | None Listed                                                                                  |
| 22196    | OS  | Female | 55  | Caucasian | 6     | 12             |                                                                                              |
| 22536    | OD  | Male   | 77  | Caucasian | 1     | 12             | Leukemia, thrombocytopenia, transfusions (O-neg 6/14 & 6/15, platelets 6/15)                 |
| 22536    | OS  | Male   | 77  | Caucasian | 2     | 12             |                                                                                              |
| 32115    | OD  | Male   | 77  | Caucasian | 3     | 12             | Brain CA, PMH: Afib, COPD, Smoker, brain CA                                                  |
| 32115    | OS  | Male   | 77  | Caucasian | 4     | 12             |                                                                                              |
| 34085    | OD  | Male   | 87  | Caucasian | 5     | 14             | ESLD, Abdominal pain 2/2 TURP on 8/14. COVID NEG 8/18.                                       |
| 34085    | OS  | Male   | 87  | Caucasian | 6     | 14             |                                                                                              |

Supplemental Table 2: Tabulation of custom TaqMan gene expression array plate probes embedded on the plates

| ThermoFisher Scientific Assay ID | Gene Symbol(s) | Gene Name(s)                               |
|----------------------------------|----------------|--------------------------------------------|
| Hs99999901 sl                    | 18s rRNA       | Eukaryotic 18S ribosomal RNA               |
| Hs99999905 ml                    | GAPDH          | Glyceraldehyde-3-Phosphate Dehydrogenase   |
| Hs99999909 ml                    | HPRT           | Hypoxanthine Phosphoribosyltransferase 1   |
| Hs99999908 ml                    | GUSB           | Glucuronidase Beta                         |
| Hs02758991 gl                    | GAPDH          | glyceraldehyde-3-phosphate dehydrogenase   |
| Hs01048932 gl                    | BCL2           | BCL2, apoptosis regulator                  |
| Hs00180269 ml                    | BAX            | BCL2 associated X, apoptosis regulator     |
| Hs00234387 ml                    | CASP3          | caspase 3                                  |
| Hs00169152 ml                    | CASP7          | caspase 7                                  |
| Hs01018151 ml                    | CASP8          | caspase 8                                  |
| Hs00152939_ml                    | TLR4           | toll like receptor 4                       |
| Hs00174128 ml                    | TNF            | tumor necrosis factor                      |
| Hs00909233 ml                    | GFAP           | glial fibrillary acidic protein            |
| Hs00609286 ml                    | GSS            | glutathione synthetase                     |
| Hs00610419_gl                    | AIFI           | allograft inflammatory factor 1            |
| Hs01060992 ml                    | RBPMS          | RNA binding protein with multiple splicing |
| Hs00366711 ml                    | POU4F1         | POU class 4 homeobox 1                     |
| Hs00231820 ml                    | POU4F2         | POU class 4 homeobox 2                     |
| Hs00231275_ml                    | POU4F3         | POU class 4 homeobox 3                     |
| Hs00158126 ml                    | ISLI           | ISL LIM homeobox 1                         |
| Hs06633377 sl                    | THY1           | Thy-1 cell surface antigen                 |
| Hs00606024 ml                    | NEFH           | neurofilament heavy polypeptide            |
| Hs00196245_ml                    | NEFL           | neurofilament, light polypeptide           |
| Hs00892431 ml                    | RHO            | rhodopsin                                  |
| Hs00925200 ml                    | PRKCA          | protein kinase C alpha                     |
| Hs00270282 ml                    | STXIA          | syntaxin IA                                |
